# Supplementary material for: Identification, characterization, and gene expression analysis of nucleotide binding site (NB)-type resistance gene homologues in switchgrass
Source: PubMed Central journal article supplement (PMC5100175; doi:10.1186/s12864-016-3201-5), 2016-11-08

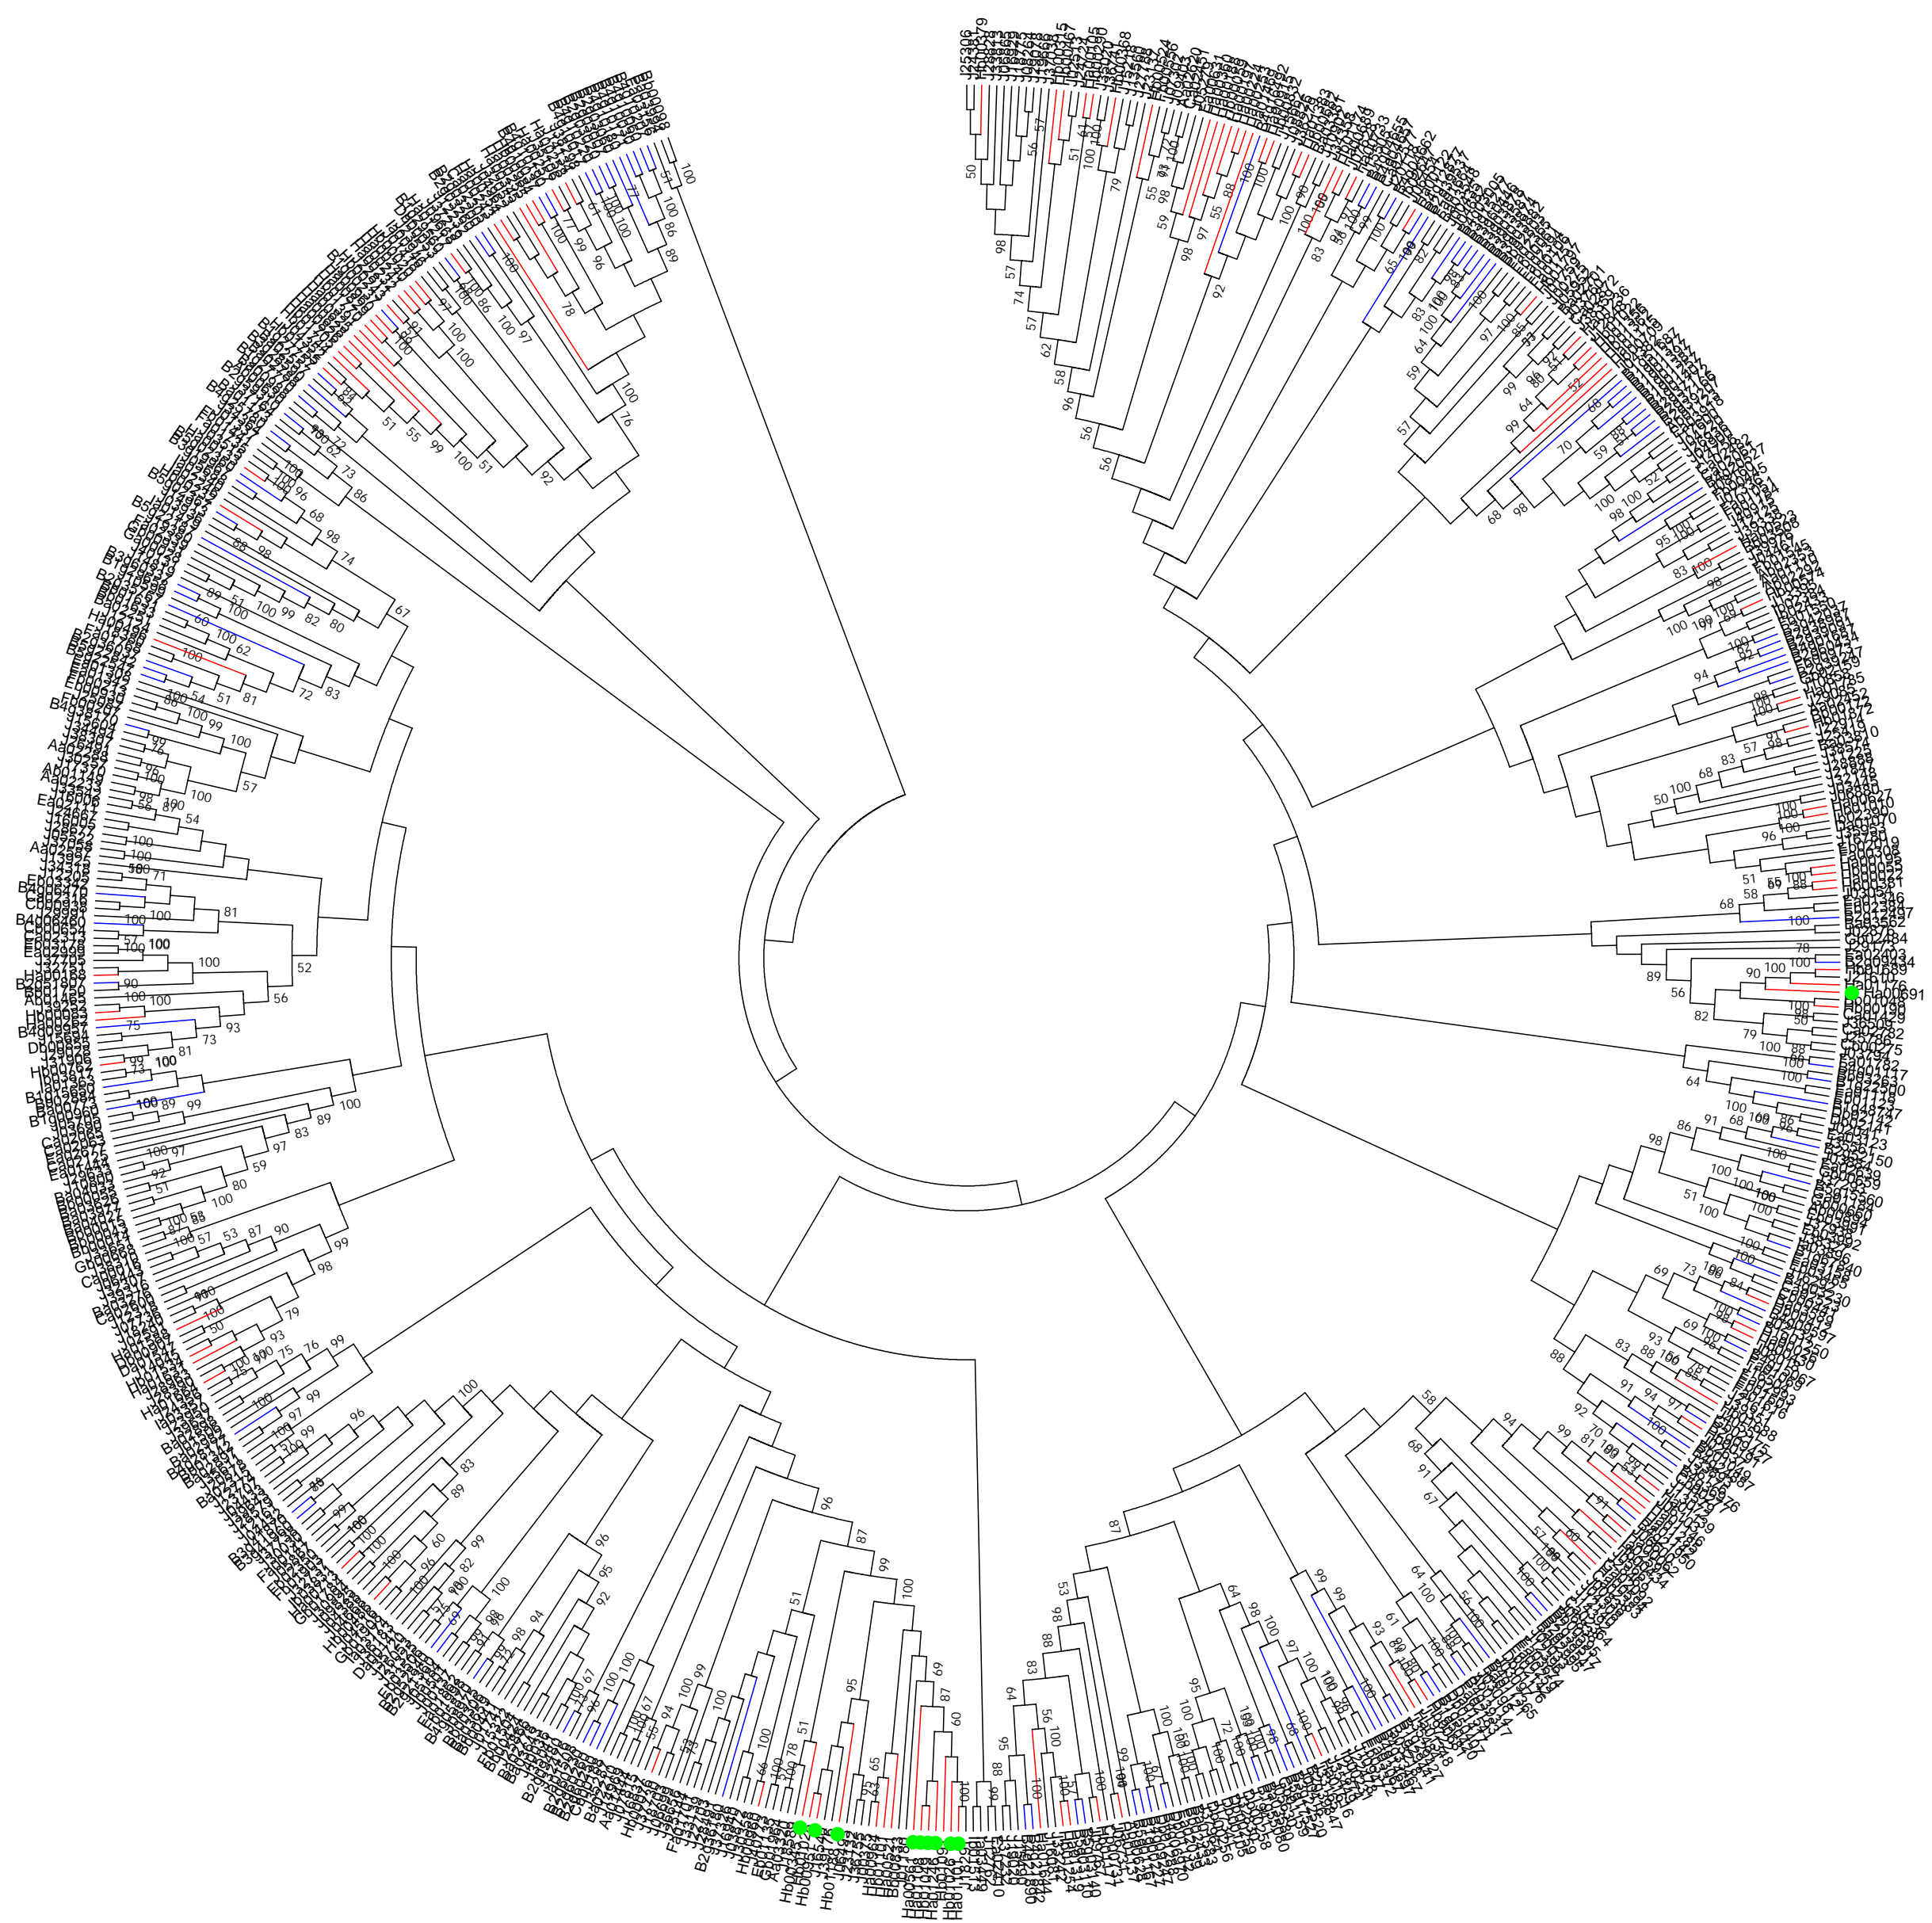

Supplement: 12864_2016_3201_MOESM7_ESM.pdf [file 12864_2016_3201_MOESM7_ESM.pdf]
